# Supplementary material for: Modular Organization and Combinatorial Energetics of Proline–Tyrosine Nuclear Localization Signals
Source: PLOS journal article supplement (doi:10.1371/journal.pbio.0060137), 2008-05-28
Supplement: S2 (10.1371/journal.pbio.0060137.s002) [file journal.pbio.0060137.s002]

**Table S2**

*Summary of ITC data for mutations of the PY motif of Hrp1p*

| *Hrp1p*ef | *KD*a  *(nM)* | *∆G*b  *(kcal/mol)* | *∆H*  *(kcal/mol)* | *T∆S*c  *(kcal/mol/K)* | *∆∆G*d  *(kcal/mol)* | *KDmutant/KDwt* |
| --- | --- | --- | --- | --- | --- | --- |
| 531PY532(wildtype) | 32±16 | -10.1±0.3 | -10.0±0.5 | 0.09±0.7 | — | — |
| 531PY532/PM | 2237±400 | -7.6±0.1 | -4.4±0.2 | 3.2±0.2 | 2.5±0.3 | 69.9±0.4 |
| 531PY532/PF | 116±30 | -9.2±0.2 | -8.0±0.2 | 1.2±0.2 | 0.8±0.3 | 3.6±0.5 |
| 531PY532/PH | 1002±350 | -8.0±0.2 | -8.8±0.7 | -0.7±0.7 | 2.0±0.4 | 27.1±0.6 |

a stoichiometry = 0.9-1.1; b ΔG = -RTlnKa; c TΔS = (ΔH-ΔG); d ΔΔG = -RTln(Kd_wt/Kd_mut); e single experiment for each mutant (errors from curve fitting); f No heat was detected when Y532 was mutated to amino acids G, A, C, S, T, D, E, N, Q, K, R, V, L, I, P or W.
