# Supplementary material for: Modular Organization and Combinatorial Energetics of Proline–Tyrosine Nuclear Localization Signals
Source: PLOS journal article supplement (doi:10.1371/journal.pbio.0060137), 2008-05-28
Supplement: S3 (10.1371/journal.pbio.0060137.s003) [file journal.pbio.0060137.s003]

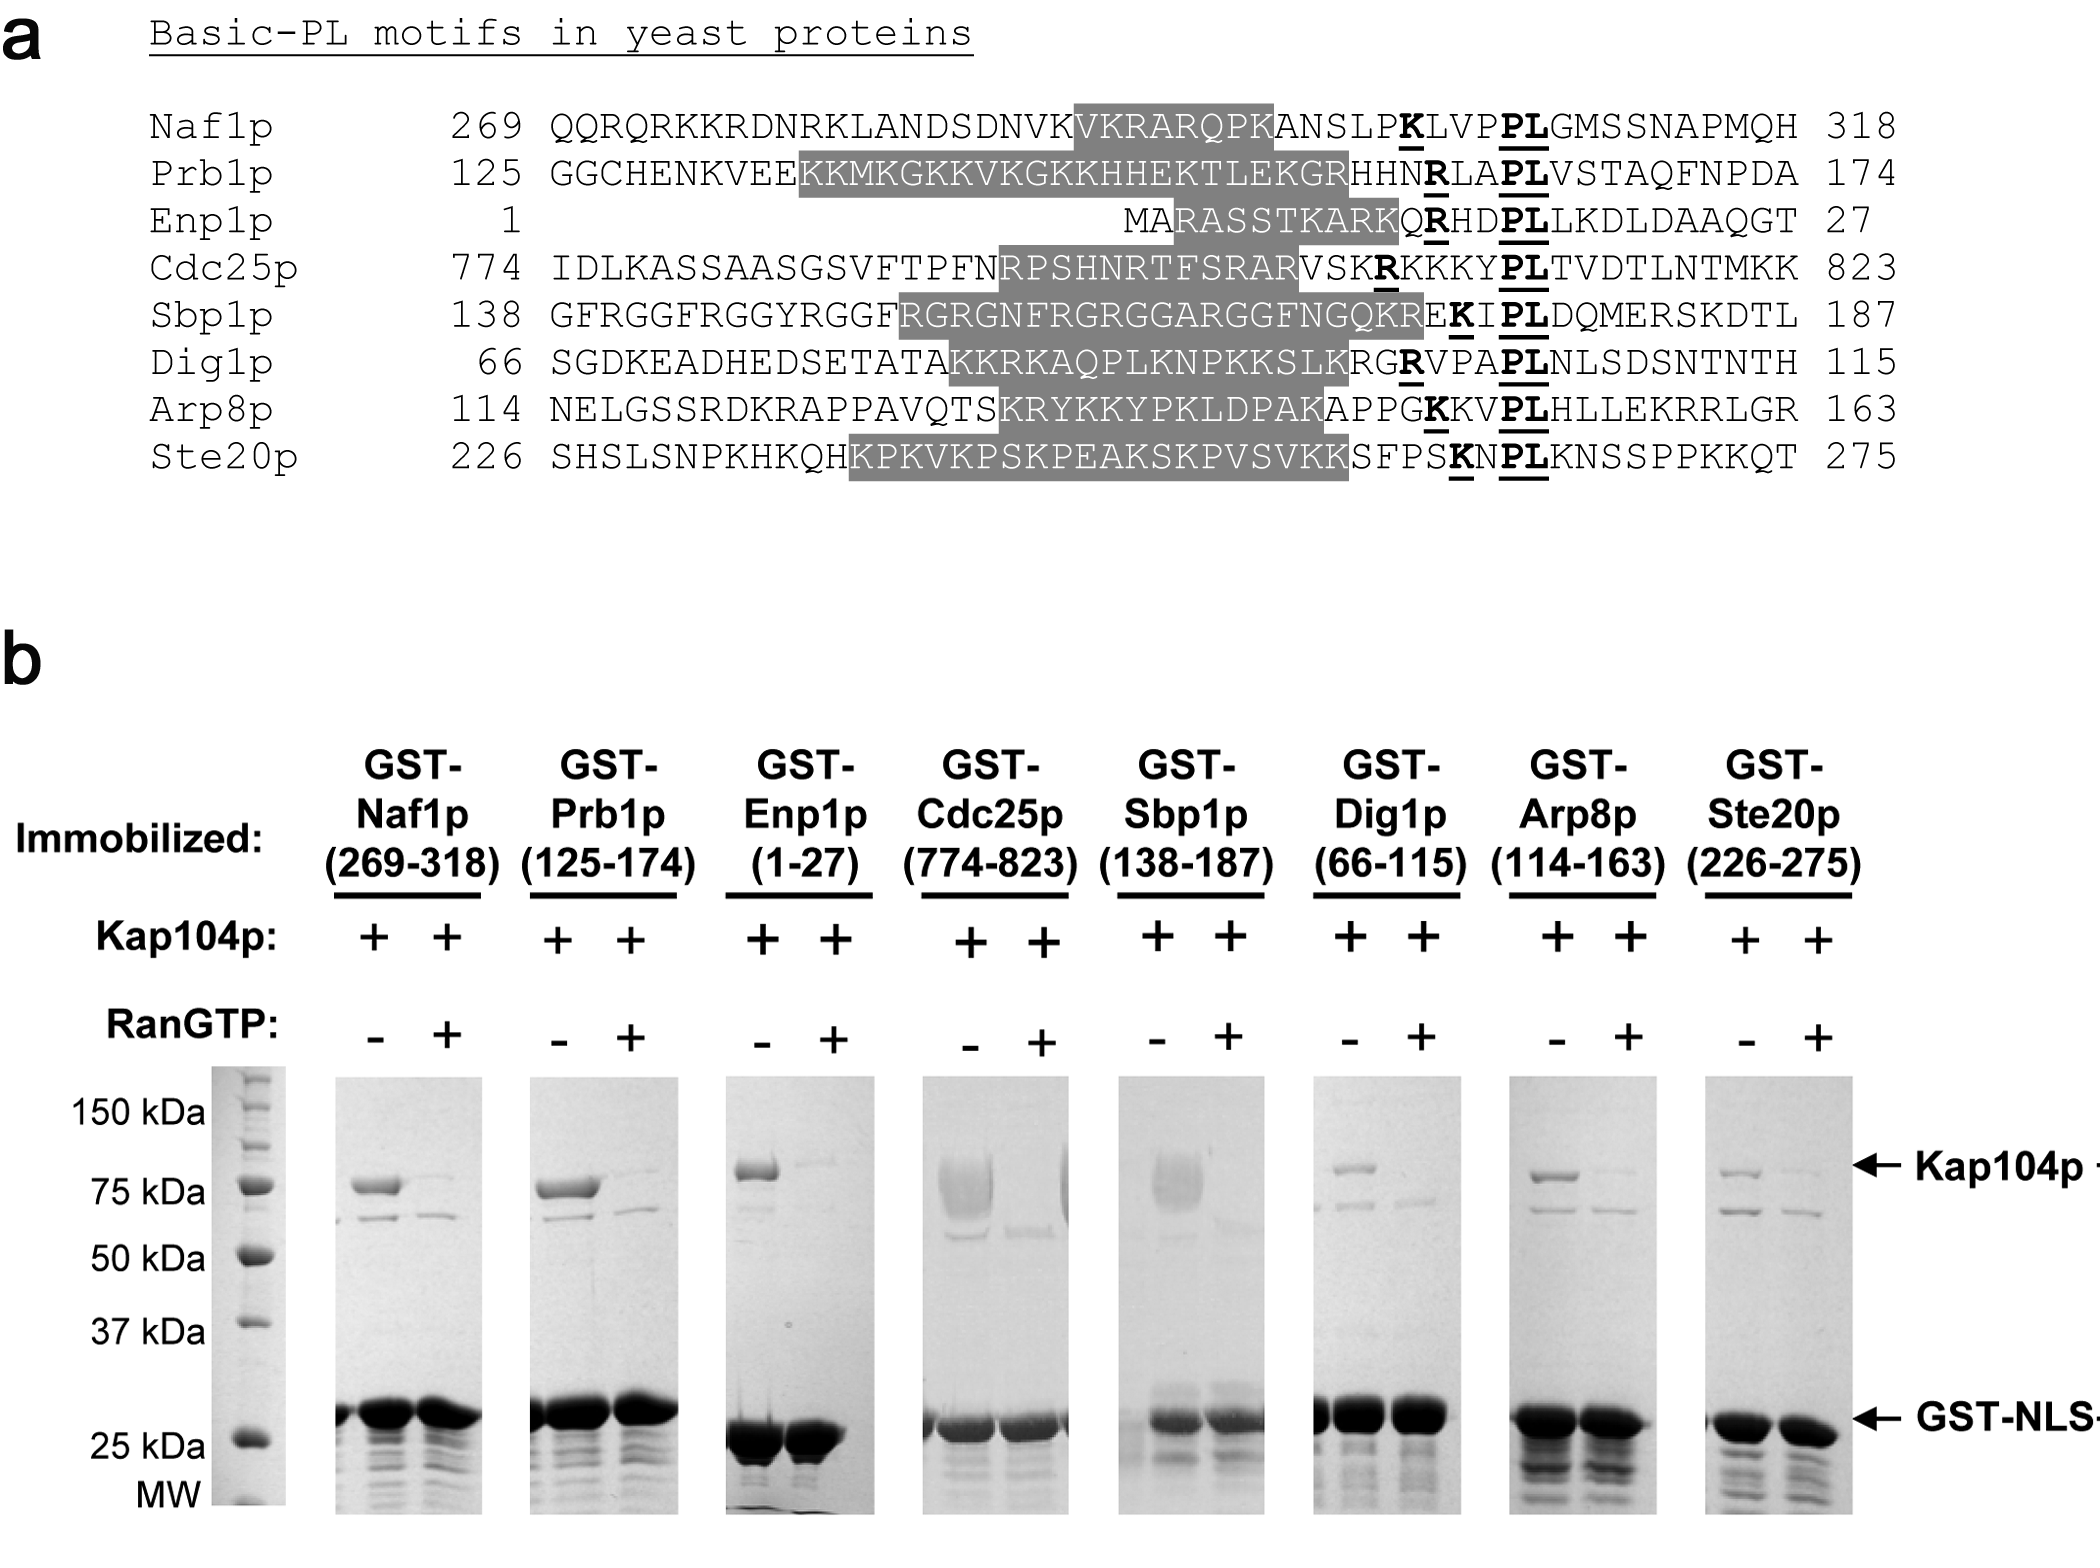


**Figure S3.** Kap104 recognizes potential basic-PL-NLSs. *(a)* The sequences of predicted basic-PL motifs in yeast proteins. Basic motifs are shaded in dark grey and the Rx2-5PY(L) motif is in bold and underlined. *(b)* Experimental testing of predicted bPL substrates. Kap104p is added to immobilized GST-NLSs in the presence or absence of RanGTP. Bound proteins are visualized with Coomassie blue. Faint bands at ~ 70kD are likely heat shock protein contaminants.
